# Supplementary material for: Role of Kallikrein 7 in Body Weight and Fat Mass Regulation
Source: MDPI journal article supplement (doi:10.3390/biomedicines9020131), 2021-01-29
Supplement: s1 [file s1]

## Supplementary Data

### Role of Kallikrein 7 in body weight and fat mass regulation

A Kunath, J Weiner, K Krause, M Rheders, A Pejkovska, M Gericke, ML Biniossek, S Dommel, M Kern, A Ribas-Latre, O Schilling, K Brix, M Stumvoll, N Klöting, JT Heiker and M Blüher

### Supplementary Figure S1

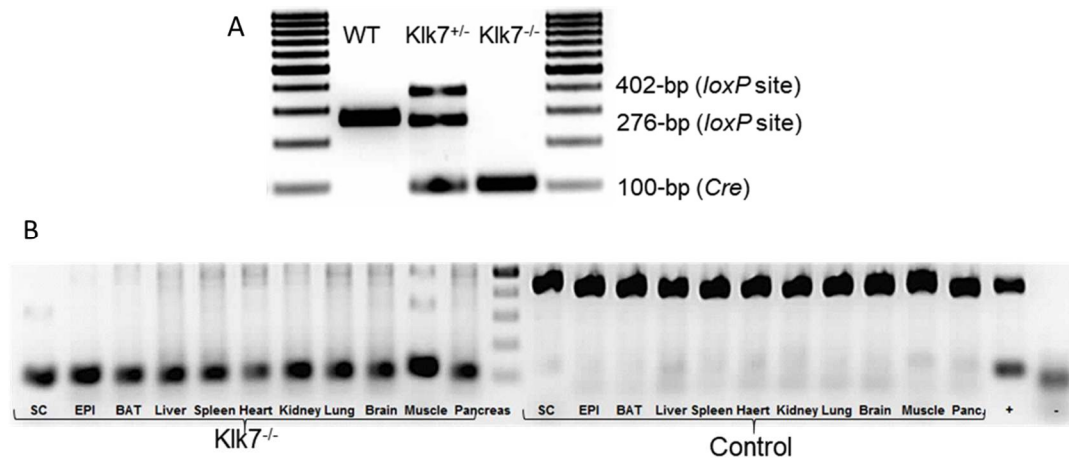

**Supplementary Figure S1: Genotyping of CMV-Cre<sup>+</sup> *Kik7*<sup>fl/fl</sup> animals.** (A) Genomic DNA from control mice produced a 276 bp band (lane 2); a 402 bp band (*loxP* site) and a 100 bp (*Cre*) band was detected in *Kik7*<sup>+/-</sup> mice (lane 3); only 100-bp (*Cre*) band was observed in *Kik7*<sup>-/-</sup> mice (lane 4). (B) Knockdown of different tissues (inguinal (iWAT), epididymal (eWAT) and brown adipose tissue (BAT); liver, spleen, heart, kidney, lung, brain, muscle, pancreas) from control and *Kik7*<sup>-/-</sup> mice on DNA level.

## Supplementary Figure S2

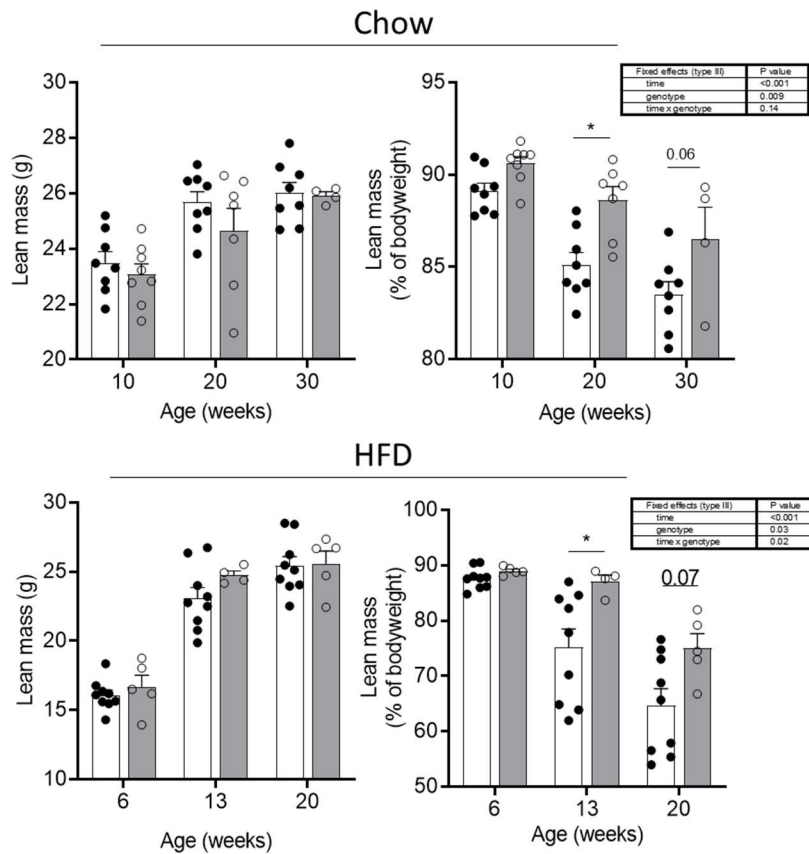

**Supplementary Figure S2.** Lean mass in chow- (top panel, absolute and relative) and HFD-fed (lower panel, absolute and relative) animals. Data is presented as mean  $\pm$  SEM. \*  $p < 0.05$ , Two-Way ANOVA with Sidak correction for multiple testing.

### Supplementary Figure S3

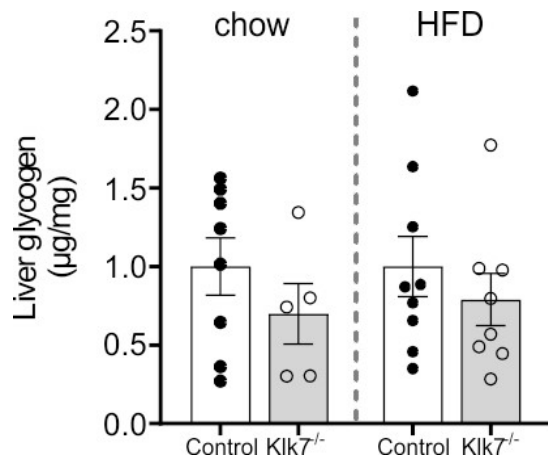

**Supplementary Figure S3.** Liver glycogen content was not changed in *Kik7*<sup>-/-</sup> mice under both diets.

## Supplementary Figure S4

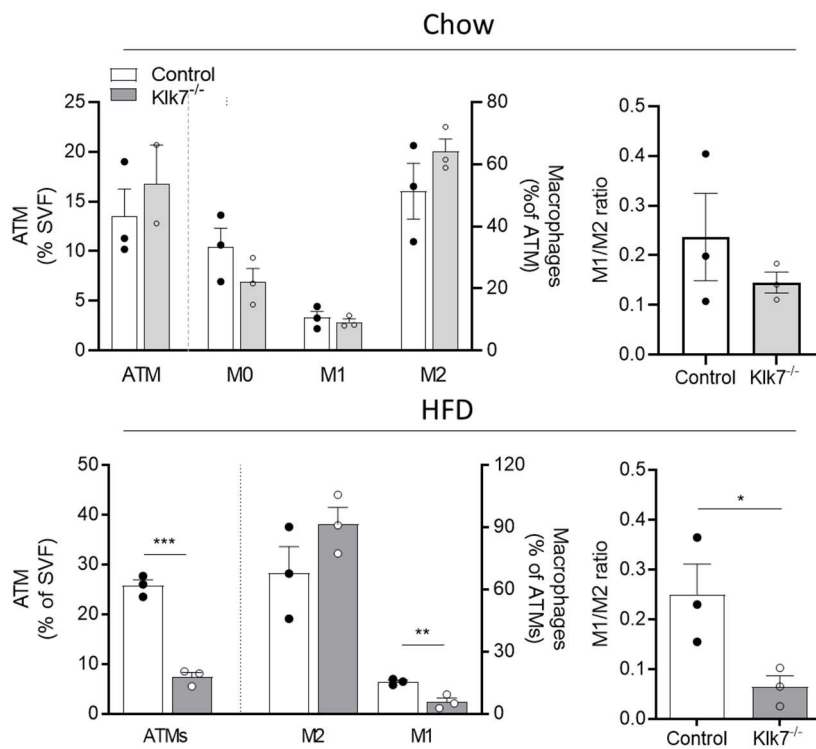

**Supplementary Figure S4.** Analysis of macrophage polarization in eWAT. Total ATM percentage as well as M0, M1 and M2-polarized macrophages are presented. Furthermore the M1/M2 ratio was calculated for *Kik7*<sup>-/-</sup> and control mice (n = 3 per genotype). Data are presented as mean ± SEM and differences between genotypes were tested for statistical significance by two-tailed Student's t-test; \*P < 0.05, \*\*P < 0.01, \*\*\*P < 0.001.

## Supplementary Figure S5

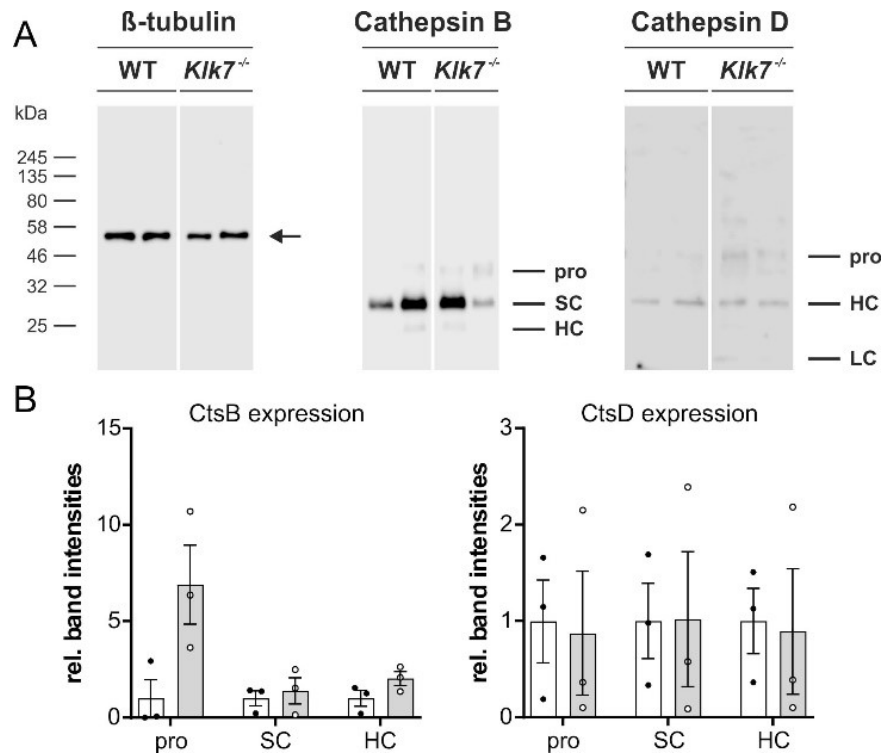

**Supplementary Figure S5.** Representative Western blot analysis of cathepsin B and D expression (pro- (pro), single-chain (SC), and heavy chain (HC), high molecular weight (HMW) and tubulin (TUB) in thyroid tissue of control and *Klk7*<sup>-/-</sup> mice. Densitometric quantification is presented on the right and revealed no significant changes.
