# Supplementary material for: Role of Kallikrein 7 in Body Weight and Fat Mass Regulation
Source: Biomedicines. 2021 Jan 29;9(2):131. doi: 10.3390/biomedicines9020131 (PMC7912635; doi:10.3390/biomedicines9020131)
Supplement: Supplementary file 1 [file biomedicines-09-00131-s001.zip › biomedicines-1083559 Supplementary Tables S1-S6.xlsx]

## Sheet: Table S1 Primers
Gene name	Primer sequence 5’ to 3’	Gene name	Primer sequence 5’ to 3’
36B4	fw: AAGCGCGTCCTGGCATTGTCT	Elovl3	fw: TCCGCGTTCTCATGTAGGTCT
	rev: CCGCAGGGGCAGCAGTGGT		rev: GGACCTGATGCAACCCTATGA
Cidea	fw: GCCGTGTTAAGGAATCTGCTG	Pdk4	fw: CGCTTAGTGAACACTCCTTCG
	rev: TGCTCTTCTGTATCGCCCAGT		rev: CGAACTTTGACCAGCGTGT
Dio1	fw: GGGCAGGATCTGCTACAAGG	Tbx1	fw: GGCAGGCAGACGAATGTTC
	rev: CGTGTCTAGGTGGAGTGCAA		rev: TTGTCATCTACGGGCACAAAG
Dio2	fw: CAGTGTGGTGCACGTCTCCAATC	Tmem26	fw: AGGGGCTTCCTTAGGGTTTTC
	rev: TGAACCAAAGTTGACCACCAG		rev: CCGTCTTGGATGAAGAAGCTG
Ucp1	fw: ACTGCCACACCTCCAGTCATT	Tbg	fw: TGGGCATGTGCTATCATCTTCA
	rev: TTGTCATCTACGGGCACAAAG		rev: GAGTGGCATTTTGTTGGGGC
Vaspin	fw: CCGCATCTCGTCTACTTAC	Prdm16	fw: ACACGCCAGTTCTCCAACCTGT
	rev: CTCCCACCTTCAGGCTTC		rev: TGCTTGTTGAGGGAGGAGGTA
Pgc1a	fw: CTTTTGTGGACGGAAGCAAT	Fgf21	fw: CCGCAGTCCAGAAAGTCTCC
	rev: GAGTCTTGGGAAAGGACACG		rev: CTGCAGGCCTCAGGATCAAA

## Sheet: Table S2 HFD vs SD WT DEG
	Table S2. List of proteins differentially expressed in obese-WT vs lean-WT mice (adj. PVAL<0.05)
	eWAT						iWAT
	Gene name	ID	log2FC	adj. PVAL	Name		Gene name	ID	log2FC	adj. PVAL	Name
			exclusive						exclusive
	Lgals3	P16110	3.26306	0.0257626			Snd1	Q78PY7	2.82786	0.0363802
	Fabp5	Q05816	2.72337	0.00996526			Fabp5	Q05816	2.27668	0.0040011
	Echdc1	Q9D9V3	2.41702	0.00273408			Sh3bgrl	Q9JJU8	2.17384	0.00501306
	Iqgap1	Q9JKF1	2.11915	0.0257626			Hebp1	Q9R257	2.09889	0.016156
	Ctsb	P10605	2.09619	0.0297169			Aldh3b2	E9Q3E1	2.0436	0.00290777
	Me1	P06801	2.02656	0.000411827			G6pdx	Q00612	1.97963	0.016156
	Mvp	Q9EQK5	1.96761	0.020943			Eif5a	P63242	1.95236	0.00581546
	Apoa4	P06728	1.89527	0.0131416			Sod3	O09164	1.89819	0.0331872
	Rtn4	Q99P72	1.81555	0.00199875			Lgals3	P16110	1.83608	0.012567
	Acadl	P51174	1.74859	0.0197176			Apoa4	P06728	1.77138	0.0066199
	Prxl2a	Q9CYH2	1.74608	0.00407411			Cyb5b	Q9CQX2	1.77059	0.0140755
	Serpinh1	P19324	1.64767	0.0340332			Cavin3	Q91VJ2	1.76794	0.033792
	Hsd17b12	O70503	1.63356	0.0178278			Usp5	P56399	1.69657	0.00501306
	Gda	Q9R111	1.6302	0.00117158			Atp6v1a	P50516	1.68416	0.0133873
	Anxa1	P10107	1.54906	0.0135667			Pcyox1	Q9CQF9	1.63901	0.00828764
	Lrpap1	P55302	1.46726	0.0179446			Sncg	Q9Z0F7	1.62672	0.00734316
	Sorbs1	Q62417	1.46011	0.0240399			Blvra	Q9CY64	1.59086	0.010611
	Ehd1	Q9WVK4	1.44436	0.00199875			Ech1	O35459	1.56987	0.00717011
	Agpat2	Q8K3K7	1.40338	0.0285903			Rtn4	Q99P72	1.499	0.0150453
	Map4	P27546	1.38712	0.0293057			Pgd	Q9DCD0	1.40821	0.0358597
	Aldh1a7	O35945	1.37274	0.0178278			Apoc3	P33622	1.33348	0.016156
	Hspb1	P14602	1.33243	0.0258668			Dync1h1	Q9JHU4	1.30374	0.0386846
	Mpp1	P70290	1.3217	0.00199875			Cct5	P80316	1.27688	0.00828764
	Itga7	Q61738	1.31953	0.00516583			Cstb	Q62426	1.26207	0.016156
	Pgd	Q9DCD0	1.31508	0.00331453			Dusp3	Q9D7X3	1.23946	0.017951
	Dusp3	Q9D7X3	1.29902	0.00509822			Mapre1	Q61166	1.23326	0.0199862
	Ltc4s	Q60860	1.28735	0.0197176			Agpat2	Q8K3K7	1.23029	0.016156
	Cast	P51125	1.28563	0.020943			Lrg1	Q91XL1	1.21736	0.016156
	Apoe	P08226	1.27114	0.0422512			Lasp1	Q61792	1.18832	0.00581546
	Vim	P20152	1.24494	0.0139139			Rab18	P35293	1.16793	0.00717011
	Bcl2l13	P59017	1.21639	0.00516583			Gmfb	Q9CQI3	1.15651	0.010611
	Aldh3b2	E9Q3E1	1.20285	0.0297169			Pon3	Q62087	1.13497	0.0492396
	Zyx	Q62523	1.19898	0.0367969			Mapk3	Q63844	1.11255	0.0455105
	G6pdx	Q00612	1.18574	0.00235925			Psmb3	Q9R1P1	1.11212	0.0203705
	Acsl1	P41216	1.17471	0.0144415			Cyb5r3	Q9DCN2	1.09813	0.016156
	Sparc	P07214	1.16685	0.0179474			Aldh1a1	P24549	1.08865	0.016156
	Ehd4	Q9EQP2	1.15609	0.0293057			Acsl6	Q91WC3	1.08203	0.0234031
	Septin2	P42208	1.12957	0.0067858			Fah	P35505	1.03734	0.016156
	Ctsz	Q9WUU7	1.1221	0.0272135			Psmb1	O09061	0.998407	0.0122226
	Vwa5a	Q99KC8	1.11093	0.0297169			Actn4	P57780	0.972856	0.0455501
	Cyb5b	Q9CQX2	1.09847	0.02616			Kctd12	Q6WVG3	0.969919	0.0424495
	Anxa5	P48036	1.092	0.0067858			Vim	P20152	0.966158	0.0140755
	Lamtor1	Q9CQ22	1.07074	0.0139139			Anxa6	P14824	0.961084	0.0278493
	Bckdha	P50136	1.05897	0.0209981			Rps14	P62264	0.935619	0.0251158
	Acox1	Q9R0H0	1.02369	0.0340332			Prdx5	P99029	0.900736	0.0164402
	Cat	P24270	1.02285	0.0108001			Ywhab	Q9CQV8	0.892325	0.0371538
	Cdh13	Q9WTR5	1.01059	0.0131416			Dars1	Q922B2	0.89189	0.0274591
	Tubb2a	Q7TMM9	0.995953	0.0367969			Vars1	Q9Z1Q9	0.891011	0.033792
	Mapk3	Q63844	0.977944	0.0421596			Sars1	P26638	0.888365	0.0274591
	Atl3	Q91YH5	0.972936	0.0179446			Anxa5	P48036	0.844072	0.0386846
	Fah	P35505	0.93253	0.0307549			Prxl2a	Q9CYH2	0.835448	0.0433482
	Tgm2	P21981	0.926492	0.0179474			Gstm2	P15626	0.802779	0.0180896
	S100a6	P14069	0.91712	0.0289054			Tubb5	P99024	0.783286	0.020284
	Sgta	Q8BJU0	0.917064	0.0285903			Fabp4	P04117	0.739827	0.0424495
	Rras2	P62071	0.907093	0.0232478			Tcp1	P11983	0.727145	0.020284
	Aldoa	P05064	0.894993	0.00777133			Mlec	Q6ZQI3	0.70771	0.0424495
	Lasp1	Q61792	0.873273	0.0390161			Lamtor1	Q9CQ22	0.703729	0.0492396
	C11orf54	Q91V76	0.871109	0.0426179			Psmb6	Q60692	0.694639	0.0339462
	Cdv3	Q4VAA2	0.867256	0.0408626			Arhgdia	Q99PT1	0.69377	0.0453252
	Msn	P26041	0.851467	0.0154086			Tuba1c	P68373	0.688413	0.0386846
	Fkbp1a	P26883	0.849354	0.0179474			Rpl4	Q9D8E6	0.674298	0.0424495
	Capza2	P47754	0.826655	0.0338428			Cfl1	P18760	0.661532	0.034915
	Grb2	Q60631	0.819771	0.0426179			Comt	O88587	0.626624	0.0454502
	Elavl1	P70372	0.807045	0.0463332			Rps3a	P97351	0.606476	0.0190686
	Coro1c	Q9WUM4	0.791802	0.0463332			Akr1a1	Q9JII6	0.57309	0.0424495
	Arhgdia	Q99PT1	0.774202	0.0463332			Ppa1	Q9D819	-0.628249	0.033792
	Adpgk	Q8VDL4	0.762878	0.0316093			Ndufs5	Q99LY9	-0.728911	0.0278365
	Tubb5	P99024	0.756943	0.0131416			Ivd	Q9JHI5	-0.742531	0.0433482
	Psmb3	Q9R1P1	0.748578	0.0179474			Echdc3	Q9D7J9	-0.79504	0.0387622
	Aldh9a1	Q9JLJ2	0.725581	0.0463332			Ldhc	P00342	-0.881266	0.0285669
	Slc27a1	Q60714	0.711732	0.0211798			Tpi1	P17751	-1.0085	0.0103846
	Tpt1	P63028	0.705468	0.0193871			Lum	P51885	-1.04951	0.041414
	Apoa1	Q00623	0.703395	0.0390161			Cox4i1	P19783	-1.07433	0.0178265
	Pcyox1	Q9CQF9	0.689789	0.0489068			Pgm1	Q9D0F9	-1.11505	0.00734316
	Snx2	Q9CWK8	0.686825	0.0209981			Gpi	P06745	-1.12627	0.0122831
	Cs	Q9CZU6	0.678237	0.0285903			Suclg2	Q9Z2I8	-1.16942	0.0101909
	Slc25a1	Q8JZU2	0.661254	0.0489068			Pkm	P52480	-1.18979	0.0480948
	Acadm	P45952	0.659746	0.0367969			Got1	P05201	-1.24328	0.0454502
	Hadha	Q8BMS1	0.579264	0.0492658			Ldha	P06151	-1.24462	0.00581546
	Hspa8	P63017	0.575016	0.0297169			Slc25a5	P51881	-1.26958	0.00398886
	Rab2a	P53994	-0.714312	0.0491812			Gapdh	P16858	-1.27399	0.00771241
	Hnrnpa0	Q9CX86	-0.920311	0.027444			Krt76	Q3UV17	-1.41495	0.016156
	Asah1	Q9WV54	-0.997166	0.0354589			Crip1	P63254	-1.42412	0.0433482
	Erlin2	Q8BFZ9	-1.1512	0.0213036			Gys1	Q9Z1E4	-1.50253	0.0274591
	Tra2b	P62996	-1.15972	0.0297169			Igha	A0A0A6YXW6	-1.51139	0.00734316
	Vdac2	Q60930	-1.16692	0.0285903			Coq9	Q8K1Z0	-1.52091	0.0122226
	Cox5a	P12787	-1.2134	0.0285903			Aspn	Q99MQ4	-1.54326	0.0453401
	Lclat1	Q3UN02	-1.24165	0.0245061			Dcn	P28654	-1.58919	0.0116099
	Lman2	Q9DBH5	-1.33839	0.017657			Pgk1	P09411	-1.62752	0.0433482
	Pygb	Q8CI94	-1.40823	0.0108001			Acta1	P68134	-1.6683	0.0454502
	Acat3	Q80X81	-1.44067	0.0257626			Aldoa	P05064	-1.84599	0.00474342
	Cfd	P03953	-1.64594	0.0255007			Nefm	P08553	-1.92092	0.00717011
	Erp44	Q9D1Q6	-1.65324	0.0139139			Mfap2	P55002	-2.11644	0.0283308
	Rab6a	P35279	-1.79072	0.0255007			Gpd2	Q64521	-2.15715	0.016156
	Uggt1	Q6P5E4	-3.06955	0.0193871			Pdlim5	Q8CI51	-2.16408	0.0424495
	Hspa2	P17156	-3.07162	0.00718764			Col1a1	P11087	-2.61513	0.0424495
	Hk1	P17710	-3.26567	0.0154086			Col1a2	Q01149	-2.79345	0.0181747
	Cirbp	P60824	-3.6232	0.0316093			Pfkm	P47857	-3.27196	0.00300355
	Pdxdc1	Q99K01	-3.85869	0.0067858			Fhl3	Q9R059	-3.3145	0.0117466
	Nucb2	P81117	-3.88791	0.00199875			Pgam2	O70250	-3.43925	0.000523611
	Gk	Q64516	-4.02038	0.0213036			Ak1	Q9R0Y5	-4.44396	0.0424495
	Basp1	Q91XV3	-4.13581	0.000411827			Tpm1	P58771	-4.94977	0.00462886
	Itm2b	O89051	-4.16493	0.0307549			Pygm	Q9WUB3	-5.96048	0.00717011
	Rcn1	Q05186	-5.36822	0.000411827			Myh2	G3UW82	-6.7575	0.0122226
	Got2	P05202	-5.59522	0.00199875			Atp2a3	Q64518	-7.46184	0.0037474
	Ace	P09470	Exclusive in lean		Angiotensin-converting enzyme		Neb	E9Q1W3	-7.84343	0.00581546
	Acp6	Q8BP40	Exclusive in lean		Lysophosphatidic acid phosphatase type 6		Atp2a1	Q8R429	-8.27586	2.04608e-05
	Akap3	O88987	Exclusive in lean		A-kinase anchor protein 3		Ttn	A2ASS6	-8.93904	0.010611
	Cenpv	Q9CXS4	Exclusive in lean		Centromere protein V		Mylpf	P97457	-9.4527	0.00153195
	Col6a6	E9Q6A6	Exclusive in lean		Collagen alpha-6(VI) chain		Actn3	O88990	-9.62333	0.000175279
	Cyp2f2	P33267	Exclusive in lean		Cytochrome P450 2F2		Myh4	Q5SX39	-11.6201	0.016156
	Emilin1	Q99K41	Exclusive in lean		Elastin microfibril interface-located protein 1		Psat1	Q3U6K9	Exclusive in obese		Phosphoserine aminotransferase
	Gstm5	E9PVM7	Exclusive in lean		Glutathione S-transferase		Bpgm	P15327	Exclusive in obese		Bisphosphoglycerate mutase
	Gstm6	O35660	Exclusive in lean		Glutathione S-transferase Mu 6		Cox6a1	P43024	Exclusive in obese		Cytochrome c oxidase subunit 6A1, mitochondrial
	H2ab1	Q9CQ70	Exclusive in lean		Histone H2A-Bbd type 1		Abhd15	Q5F2F2	Exclusive in obese		Alpha/beta hydrolase domain-containing protein 15
	Il5ra	P21183	Exclusive in lean		Interleukin-5 receptor subunit alpha		Fubp3	A0A0A6YVV5	Exclusive in obese		Far upstream element (FUSE)-binding protein 3 (Fragment)
	Lamtor5	Q9D1L9	Exclusive in lean		Late endosomal/lysosomal adaptor and MAPK and MTOR activator 5		Gga1	A0A2R8VI72	Exclusive in obese		ADP-ribosylation factor-binding protein GGA1
	Lcn2	P11672	Exclusive in lean		Neutrophil gelatinase-associated lipocalin (NGAL) (Lipocalin-2)		Acin1	F6RJ39	Exclusive in obese		Apoptotic chromatin condensation inducer in the nucleus (Fragment)
	Mospd1	Q8VEL0	Exclusive in lean		Motile sperm domain-containing protein 1		Ctsl	P06797	Exclusive in obese		Cathepsin L1
	Myo1b	E9QNH6	Exclusive in lean		Unconventional myosin-Ib		Fdxr	Q61578	Exclusive in obese		Ferredoxin reductase
	Plppr3	A0A0R3P9D0	Exclusive in lean		Phospholipid phosphatase-related protein type 3		Ddx1	Q91VR5	Exclusive in obese		ATP-dependent RNA helicase DDX1 (DEAD box protein 1)
	Psat1	Q3U6K9	Exclusive in lean		Phosphoserine aminotransferase		Ranbp3	Q9CT10	Exclusive in obese		Ran-binding protein 3
	S100a1	D3YUT6	Exclusive in lean		Protein S100-A1 (S100 calcium binding protein A1, isoform CRA_a)		Csnk2a2	O54833	Exclusive in obese		Casein kinase II subunit alpha
	Sdr39u1	Q5M8N4	Exclusive in lean		Short-chain dehydrogenase/reductase family 39U member 1		Ddx6	P54823	Exclusive in obese		Probable ATP-dependent RNA helicase DDX6 (DEAD box protein 6)
	Spcs2	A0A140LJG6	Exclusive in lean		Signal peptidase complex subunit 2		Tm9sf2	P58021	Exclusive in obese		Transmembrane 9 superfamily member 2
	Vwa1	Q8R2Z5	Exclusive in lean		von Willebrand factor A domain-containing protein 1		Cstf2	Q8BIQ5	Exclusive in obese		Cleavage stimulation factor subunit 2
	Zfp185	G5E8W8	Exclusive in lean		Zinc finger protein 185		Asrgl1	Q8C0M9	Exclusive in obese		Asparaginase-like protein 1
	Rpl21	Q9CQM8	Exclusive in obese		60S ribosomal protein L21		Sf3a1	Q8K4Z5	Exclusive in obese		Splicing factor 3A subunit 1
	Dhcr7	O88455	Exclusive in obese		7-dehydrocholesterol reductase		Atg7	A0A0A0MQN4	Exclusive in obese		Ubiquitin-like modifier-activating enzyme ATG7
	Akap2	O54931	Exclusive in obese		A-kinase anchor protein 2 (AKAP-2)		Prmt1	A0A140LJF4	Exclusive in obese		Protein arginine N-methyltransferase 1 (Fragment)
	Actl6a	Q9Z2N8	Exclusive in obese		Actin-like protein 6A		Pafah1b2	A0A1L1SVK0	Exclusive in obese		Platelet-activating factor acetylhydrolase IB subunit beta (Fragment)
	Aars1	Q8BGQ7	Exclusive in obese		Alanyl-tRNA synthetase		Sec24c	A0A286YDI8	Exclusive in obese		Sec24-related gene family, member C (S. cerevisiae)
	Apoc3	A0A0R4J1N3	Exclusive in obese		Apolipoprotein C-III		Agt	P11859	Exclusive in obese		Angiotensinogen
	NARS1	Q8BP47	Exclusive in obese		Asparagine--tRNA ligase, cytoplasmic (EC 6.1.1.22) (Asparaginyl-tRNA synthetase) (AsnRS)		Rbp4	Q00724	Exclusive in obese		Retinol-binding protein 4
	Abce1	P61222	Exclusive in obese		ATP-binding cassette sub-family E member 1 (RNase L inhibitor) (Ribonuclease 4 inhibitor) (RNS4I)		Aga	Q64191	Exclusive in obese		Aspartylglucosaminidase
	Bin1	Q6P1B9	Exclusive in obese		Bin1 protein (Myc box-dependent-interacting protein 1)		Gns	Q8BFR4	Exclusive in obese		N-acetylglucosamine-6-sulfatase
	Clec3b	Q8CFZ6	Exclusive in obese		C-type lectin domain family 3, member b (Tetranectin)		Niban2	Q8R1F1	Exclusive in obese		Niban-like protein 1
	Mrc2	Q64449	Exclusive in obese		C-type mannose receptor 2 (Lectin lambda) (Macrophage mannose receptor 2) (CD antigen CD280)		Mavs	Q8VCF0	Exclusive in obese		Mitochondrial antiviral-signaling protein
	Atp2a3	B1ATS4	Exclusive in obese		Calcium-transporting ATPase (EC 3.6.3.8)		Emc6	Q9CQW0	Exclusive in obese		ER membrane protein complex subunit 6
	Cd5l	Q9QWK4	Exclusive in obese		CD5 antigen-like (Apoptosis inhibitor expressed by macrophages) (mAIM)		Prkar2a	A0A0A6YX73	Exclusive in obese		cAMP-dependent protein kinase type II-alpha regulatory subunit
	Cd81	A0A140LJL0	Exclusive in obese		CD81 antigen (Fragment)		Ppp1r12a	A0A1W2P750	Exclusive in obese		Protein phosphatase 1 regulatory subunit 12A (Fragment)
	Cidec	D3Z1A6	Exclusive in obese		Cell death activator CIDE-3 (Fragment)		Pck2	A0A2I3BQL9	Exclusive in obese		Phosphoenolpyruvate carboxykinase [GTP], mitochondrial (Fragment)
	Chmp6	B1AZ42	Exclusive in obese		Charged multivesicular body protein 6 (Fragment)		Apol7b	A0A2R8VHA9	Exclusive in obese		Apolipoprotein L 7b (Fragment)
	Dync1li1	Q8R1Q8	Exclusive in obese		Cytoplasmic dynein 1 light intermediate chain 1		Nudcd2	E0CYQ2	Exclusive in obese		NudC domain-containing protein 2
	Dpp9	Q8BVG4	Exclusive in obese		Dipeptidyl peptidase 9		Sec24d	Q6NXL1	Exclusive in obese		Sec24-related gene family, member D (S. cerevisiae)
	Dnaja2	Q9QYJ0	Exclusive in obese		DnaJ homolog subfamily A member 2 (mDj3)		Cds2	Q6PBC0	Exclusive in obese		Cds2 protein (Phosphatidate cytidylyltransferase 2)
	Dnajb2	Q9QYI5	Exclusive in obese		DnaJ homolog subfamily B member 2 (DnaJ homolog subfamily B member 10) (mDj8)		Ddi2	A2ADY9	Exclusive in obese		Protein DDI1 homolog 2
	Map2k1	P31938	Exclusive in obese		Dual specificity mitogen-activated protein kinase kinase 1		Tmed3	Q78IS1	Exclusive in obese		Transmembrane emp24 domain-containing protein 3
	Entpd5	Q9WUZ9	Exclusive in obese		Ectonucleoside triphosphate diphosphohydrolase 5		Mtch1	Q791T5	Exclusive in obese		Mitochondrial carrier homolog 1
	Stom	P54116	Exclusive in obese		Stomatin		Isoc1	Q91V64	Exclusive in obese		Isochorismatase domain-containing protein 1
	Fdps	A0A0G2JDJ5	Exclusive in obese		Farnesyl pyrophosphate synthase (Fragment)		Lpgat1	Q91YX5	Exclusive in obese		Acyl-CoA:lysophosphatidylglycerol acyltransferase 1
	Fermt3	Q8K1B8	Exclusive in obese		Fermitin family homolog 3 (Kindlin-3)		Necap2	Q9D1J1	Exclusive in obese		Adaptin ear-binding coat-associated protein 2
	Gpam	Q61586	Exclusive in obese		Glycerol-3-phosphate acyltransferase 1, mitochondrial		Dnajb1	Q9QYJ3	Exclusive in obese		DnaJ homolog subfamily B member 1
	Hmox1	P14901	Exclusive in obese		Heme oxygenase 1		Mtarc1	A0A087WPC2	Exclusive in obese		Mitochondrial amidoxime-reducing component 1
	Hnrnph2	P70333	Exclusive in obese		Heterogeneous nuclear ribonucleoprotein H2 (hnRNP H2)		Alg5	D6RCG2	Exclusive in obese		Dolichyl-phosphate beta-glucosyltransferase
	Igkv4-61	A0A075B5M2	Exclusive in obese		Immunoglobulin kappa chain variable 4-61		Stx5a	H3BJ02	Exclusive in obese		Syntaxin 5A
	Itgb2	Q542I8	Exclusive in obese		Integrin beta		Dctn4	Q3TRR2	Exclusive in obese		Dynactin subunit 4
	Ifi205a	Q8CGE8	Exclusive in obese		Interferon-inducible protein p205-A		Npr3	Q7TMG7	Exclusive in obese		Natriuretic peptide receptor 3
	Klhdc7a	A2APT9	Exclusive in obese		Kelch domain-containing protein 7A		Cald1	Q8VCQ8	Exclusive in obese		Caldesmon 1
	Lss	Q8BLN5	Exclusive in obese		Lanosterol synthase		Myo1b	E9QNH6	Exclusive in obese		Unconventional myosin-Ib
	Mrc1	Q61830	Exclusive in obese		Macrophage mannose receptor 1 (MMR) (CD antigen CD206)		Cdo1	P60334	Exclusive in obese		Cysteine dioxygenase type 1
	Cd68	P31996	Exclusive in obese		Macrosialin (CD antigen CD68)		Lrrc47	Q505F5	Exclusive in obese		Leucine-rich repeat-containing protein 47
	Prnp	P04925	Exclusive in obese		Major prion protein (PrP) (PrP27-30) (PrP33-35C) (CD antigen CD230)		Sord	Q64442	Exclusive in obese		Sorbitol dehydrogenase
	Tsc22d2	A0A0G2JFZ4	Exclusive in obese		TSC22 domain family, member 2		Clptm1	Q8VBZ3	Exclusive in obese		Cleft lip and palate transmembrane protein 1 homolog
	Map1a	Q9QYR6	Exclusive in obese		Microtubule-associated protein 1A		Rcc1	Q8VE37	Exclusive in obese		Chromosome condensation protein 1
	Slc25a10	Q9QZD8	Exclusive in obese		Solute carrier family 25 member 10		Rtcb	Q99LF4	Exclusive in obese		tRNA-splicing ligase RtcB homolog
	Plod3	Q9R0E1	Exclusive in obese		Procollagen-lysine,2-oxoglutarate 5-dioxygenase 3		Napa	Q9DB05	Exclusive in obese		Alpha-soluble NSF attachment protein (SNAP-alpha)
	Mustn1	Q99JI1	Exclusive in obese		Musculoskeletal embryonic nuclear protein 1		Dnm1l	E9PUD2	Exclusive in obese		Dynamin-1-like protein
	Pxn	A0A1D5RMM8	Exclusive in obese		Paxillin		Parva	Q3UF75	Exclusive in obese		Alpha-parvin
	Ppic	P30412	Exclusive in obese		Peptidyl-prolyl cis-trans isomerase C		Man1a1	P45700	Exclusive in obese		Mannosidase alpha class 1A member 1
	Pip4k2a	O70172	Exclusive in obese		Phosphatidylinositol 5-phosphate 4-kinase type-2 alpha		Osbp	Q3B7Z2	Exclusive in obese		Oxysterol-binding protein 1
	Pitpna	F8WGG5	Exclusive in obese		Phosphatidylinositol transfer protein alpha isoform		Tm9sf4	Q8BH24	Exclusive in obese		Transmembrane 9 superfamily member 4
	Plaa	P27612	Exclusive in obese		Phospholipase A-2-activating protein		Sec13	Q9D1M0	Exclusive in obese		Protein SEC13 homolog
	Pltp	P55065	Exclusive in obese		Phospholipid transfer protein		Ubqln2	Q9QZM0	Exclusive in obese		Ubiquilin-2 (Chap1) (DSK2 homolog) (Protein linking IAP with cytoskeleton 2)
	Impact	O55091	Exclusive in obese		Protein IMPACT (Imprinted and ancient gene protein)		Plin1	A0A0U1RNP7	Exclusive in obese		Perilipin-1 (Fragment)
	Mtdh	Q80WJ7	Exclusive in obese		Metadherin		Kif7	E9QMU1	Exclusive in obese		Kinesin-like protein KIF7
	Vac14	Q80WQ2	Exclusive in obese		Protein VAC14 homolog		Afm	O89020	Exclusive in obese		Afamin
	Rragb	G3UYP1	Exclusive in obese		Ras-related GTP-binding protein B		Nme1	P15532	Exclusive in obese		NME/NM23 Nucleoside Diphosphate Kinase 1
	Rcn3	A0A1B0GSK5	Exclusive in obese		Reticulocalbin-3		Hspa2	P17156	Exclusive in obese		Heat shock-related 70 kDa protein 2
	Rhog	A0A1B0GSL4	Exclusive in obese		Rho-related GTP-binding protein RhoG		Sec61a1	P61620	Exclusive in obese		Protein transport protein Sec61 subunit alpha isoform 1
	Septin9	A2A6U3	Exclusive in obese		Septin-9		Rmdn3	Q3UJU9	Exclusive in obese		Regulator of microtubule dynamics protein 3
	Nek9	Q8K1R7	Exclusive in obese		Never in mitosis A-related kinase 9		Maoa	Q64133	Exclusive in obese		Monoamine oxidase type A
	Pon1	P52430	Exclusive in obese		Serum paraoxonase/arylesterase 1		Cisd1	Q91WS0	Exclusive in obese		CDGSH iron-sulfur domain-containing protein 1
	Stat1	Q8CFQ1	Exclusive in obese		Signal transducer and activator of transcription 1		Lrrc59	Q922Q8	Exclusive in obese		Leucine-rich repeat-containing protein 59
	Stab1	G3X973	Exclusive in obese		Stabilin 1		Ergic1	Q9DC16	Exclusive in obese		Endoplasmic reticulum-Golgi intermediate compartment protein 1
	Stmn1	D3Z1Z8	Exclusive in obese		Stathmin		Uba2	Q9Z1F9	Exclusive in obese		Ubiquitin-like modifier-activating enzyme 2
	Nsdhl	Q9R1J0	Exclusive in obese		Sterol-4-alpha-carboxylate 3-dehydrogenase, decarboxylating		Uso1	Q9Z1Z0	Exclusive in obese		General vesicular transport factor p115 (Protein USO1 homolog)
	Sts	P50427	Exclusive in obese		Steryl-sulfatase		Cct7	A0A0N4SV00	Exclusive in obese		Chaperonin Containing TCP1 Subunit 7
	Tex264	E9Q137	Exclusive in obese		Testis-expressed gene 264		Ncln	D3YU17	Exclusive in obese		Nicalin
	Txnrd2	Q9D8I4	Exclusive in obese		Thioredoxin reductase 2		Tmx1	F6V084	Exclusive in obese		Thioredoxin-related transmembrane protein 1 (Fragment)
	Tcea1	P10711	Exclusive in obese		Transcription elongation factor A protein 1		Glg1	F8WHM5	Exclusive in obese		Golgi apparatus protein 1 (Fragment)
	Tmem120a	Q8C1E7	Exclusive in obese		Transmembrane protein 120A		Derl2	Q3U957	Exclusive in obese		Derlin
	Tpm1	P58771	Exclusive in obese		Tropomyosin-1		Pgm3	Q8BWW3	Exclusive in obese		Phosphoacetylglucosamine mutase
	Tubb6	Q922F4	Exclusive in obese		Tubulin beta-6 chain		Ugt1a7c	Q6ZQM8	Exclusive in obese		UDP-glucuronosyltransferase 1A7C
	Tbce	E0CXJ6	Exclusive in obese		Tubulin-specific chaperone E		Gpx7	Q99LJ6	Exclusive in obese		Glutathione peroxidase 7
	Csk	P41241	Exclusive in obese		Tyrosine-protein kinase CSK		Rab32	Q9CZE3	Exclusive in obese		Ras-related protein Rab-32
	Lyn	P25911	Exclusive in obese		Tyrosine-protein kinase Lyn		Akap12	Q9WTQ5	Exclusive in obese		A-kinase anchor protein 12
	Atg3	Q9CPX6	Exclusive in obese		Autophagy-related protein 3		Psmb5	O55234	Exclusive in obese		Proteasome subunit beta type-5
	Myo1d	Q5SYD0	Exclusive in obese		Unconventional myosin-Id		Alad	P10518	Exclusive in obese		Delta-aminolevulinic acid dehydratase (ALADH)
	C19orf25	Q9D7E4	Exclusive in obese		UPF0449 protein C19orf25 homolog		Ubqln1	Q8R317	Exclusive in obese		Ubiquilin-1 (Protein linking IAP with cytoskeleton 1) (PLIC-1)
							Ddah2	Q99LD8	Exclusive in obese		Dimethylarginine dimethylaminohydrolase 2
							Eif3i	Q9QZD9	Exclusive in obese		Eukaryotic translation initiation factor 3 subunit I

## Sheet: Table S3 Klk7KO vs WT HFD DEG
	Table S3. List of proteins differentially expressed in obese Klk7KO vs WT mice (adj. PVAL<0.05)
	iWAT								eWAT
	Gene name	ID	log2FC	adj. PVAL	Name	Potential substrate of KLK7	Obese or Lean marker		Gene name	ID	log2FC	adj. PVAL	Name	Potential substrate of KLK7	Obesity or lean marker
			exclusive								exclusive
	Dnah1	E9Q8T7	3.11185	0.00783839	Dynein heavy chain 1				none
	Mpz	P27573	2.36401	0.00235747	Myelin protein P0				Bid	P70444	Exclusive in Klk7KO		BH3 Interacting Domain Death Agonist
	Mbp	P04370	2.29043	0.0149822	Myelin basic protein				Cul4a	Q3TCH7	Exclusive in Klk7KO		Cullin 4A
	Chp1Sid470	P61022	1.40801	0.00155619	Calcineurin B homologous protein 1				Cyp4b1	F6X6A4	Exclusive in Klk7KO		Cytochrome P450 Family 4 Subfamily B Member 1
	Ptbp1	P17225	1.16619	0.0110929	Polypyrimidine tract-binding protein 1				Gpsm3	G3UYL4	Exclusive in Klk7KO		G Protein Signaling Modulator 3
	Plec	Q9QXS1	1.1076	0.00158261	Plectin				Il5ra	P21183	Exclusive in Klk7KO		Interleukin 5 Receptor Subunit Alpha		Lean
	Hsd17b12	O70503	1.09157	0.00353549	Very-long-chain 3-oxoacyl-CoA reductase				Mal2	Q8BI08	Exclusive in Klk7KO		Mal, T Cell Differentiation Protein 2
	Atp1a1	Q8VDN2	1.07461	0.0052828	Sodium/potassium-transporting ATPase subunit alpha-1				Myom1	Z4YJF5	Exclusive in Klk7KO		Myomesin 1
	Nsdhl	Q9R1J0	1.00477	0.0142237	Sterol-4-alpha-carboxylate 3-dehydrogenase				Nudt7	Q99P30	Exclusive in Klk7KO		Nudix Hydrolase 7
	Fkbp9	Q9Z247	0.924058	0.0143216	Peptidyl-prolyl cis-trans isomerase FKBP9				Plaat3	Q8R3U1	Exclusive in Klk7KO		Phospholipase A And Acyltransferase 3
	Sar1b	Q9CQC9	0.851354	0.00402878	GTP-binding protein SAR1b	X			Ppid	Q9CR16	Exclusive in Klk7KO		Peptidylprolyl Isomerase D
	Rgcc	Q9DBX1	0.815718	0.00825529	Regulator of cell cycle				Ppih	A2BGI9	Exclusive in Klk7KO		Peptidylprolyl Isomerase H
	Srsf2	Q62093	0.808376	0.0139513	Serine/arginine-rich splicing factor 2				Psat1	Q3U6K9	Exclusive in Klk7KO		Phosphoserine Aminotransferase 1		Lean
	Lgals1	P16045	0.802175	0.0283865	Galectin-1	X			Serpinf1	P97298	Exclusive in Klk7KO		Serpin family 1
	Npm1	Q61937	0.791519	0.0167051	Nucleophosmin				Copz1	A0A2R8VJV3	Exclusive in WT		COPI Coat Complex Subunit Zeta 1
	Pea15	Q62048	0.779364	0.0408534	Astrocytic phosphoprotein PEA-15	X			Galk2	Q68FH4	Exclusive in WT		Galactokinase 2
	Slc3a2	P10852	0.719739	0.0387418	4F2 cell-surface antigen heavy chain				Nudt12	Q9DCN1	Exclusive in WT		Nudix Hydrolase 12
	Decr1	Q9CQ62	0.646687	0.0384961	2,4-dienoyl-CoA reductase				Phpt1	Q9DAK9	Exclusive in WT		Phosphohistidine Phosphatase 1
	Snrpd3	P62320	0.643857	0.0239194	Small nuclear ribonucleoprotein Sm D3	X			Pxn	A0A1D5RMM8	Exclusive in WT		Paxillin		Obese
	Dpt	Q9QZZ6	0.593018	0.0479838	Dermatopontin				Rps15	D3YTQ9	Exclusive in WT		40S ribosomal protein S15	X
	Septin9	Q80UG5	0.592087	0.0416831	Septin-9		Obese		Sec23b	Q9D662	Exclusive in WT		SEC23 Homolog B, COPII Coat Complex Component
	Rpl9	P51410	0.583909	0.0471356	60S ribosomal protein L9	X			Tst	P52196	Exclusive in WT		Thiosulfate Sulfurtransferase
	Ndufa4	Q62425	0.565021	0.0435821	Cytochrome c oxidase subunit NDUFA4
	Acaa2	Q8BWT1	0.539291	0.00904934	3-ketoacyl-CoA thiolase
	Pgm1	Q9D0F9	0.52668	0.0139513	Phosphoglucomutase-1		Lean
	Dync1li1	Q8R1Q8	0.478348	0.0469672	Cytoplasmic dynein 1 light intermediate chain 1
	Ccar1	Q8CH18	0.471175	0.0278489	Cell division cycle and apoptosis regulator protein 1
	Prdx6	O08709	0.44274	0.0289771	Peroxiredoxin-6	X
	Ogdh	Q60597	0.366718	0.0300683	2-oxoglutarate dehydrogenase
	Arhgap18	Q8K0Q5	0.35273	0.0469672	Rho GTPase-activating protein 18
	Rab7a	P51150	0.350167	0.0355387	Ras-related protein Rab-7a	X
	Ywhae	P62259	0.345778	0.0490676	14-3-3 protein epsilon (14-3-3E)
	Lasp1	Q61792	-0.319748	0.0470826	LIM and SH3 domain protein 1
	Nomo1	Q6GQT9	-0.38054	0.0336213	Nodal modulator 1
	Cp	Q61147	-0.417057	0.0336213	Ceruloplasmin
	Sorbs3	Q9R1Z8	-0.479737	0.0300683	Vinexin
	Gpd2	Q64521	-0.494249	0.0363793	Glycerol-3-phosphate dehydrogenase		Lean
	Rpl7	P14148	-0.500831	0.0167051	60S ribosomal protein L7	X
	Mtarc2	Q922Q1	-0.506977	0.0279572	Mitochondrial amidoxime reducing component 2
	Tmed10	Q9D1D4	-0.528758	0.0279572	Transmembrane emp24 domain-containing protein 10
	Tmod3	Q9JHJ0	-0.549325	0.0336213	Tropomodulin-3	X
	Clybl	Q8R4N0	-0.63325	0.0143216	Citramalyl-CoA lyase
	Apmap	Q9D7N9	-0.634468	0.00665946	Adipocyte plasma membrane-associated protein
	Capn1	O35350	-0.637391	0.0143216	Calpain-1 catalytic subunit	X
	Cyb5b	Q9CQX2	-0.641604	0.00402878	Cytochrome b5 type B		Obese
	Tbca	P48428	-0.668555	0.0163131	Tubulin-specific chaperone A
	Setd3	Q91WC0	-0.676283	0.00217272	Actin-histidine N-methyltransferase
	Ppp1ca	P62137	-0.689387	0.0146153	Serine/threonine-protein phosphatase PP1-alpha catalytic subunit
	Hibadh	Q99L13	-0.752581	0.00653721	3-hydroxyisobutyrate dehydrogenase
	Cfh	P06909	-0.864267	0.0470826	Complement factor H
	Ephx1	Q9D379	-0.975359	0.0279572	Epoxide hydrolase 1
	Aifm1	Q9Z0X1	-1.00746	0.0336213	Apoptosis-inducing factor 1
	Retn	Q99P87	-1.08052	0.0363793	Resistin
	Phldb1	Q6PDH0	-1.08104	0.0143216	Pleckstrin homology-like domain family B member 1
	Tagln	P37804	-1.23559	0.00420541	Transgelin
	Rab6a	P35279	-1.36067	0.00172014	Ras-related protein Rab-6A
	Stip1	Q60864	-1.36702	0.0336213	Stress-induced-phosphoprotein 1
	Fus	P56959	-1.46118	0.00141138	RNA-binding protein FUS
	Cirbp	P60824	-1.52714	0.0131508	Cold-inducible RNA-binding protein	X
	Acp6	Q8BP40	Exclusive in WT		Acid Phosphatase 6
	Agt	P11859	Exclusive in WT		Angiotensinogen		Obese
	Aldh7a1	G3UYR8	Exclusive in WT		Aldehyde Dehydrogenase 7 Family Member A1
	Ap1s1	P61967	Exclusive in WT		Adaptor Related Protein Complex 1 Subunit Sigma 1
	Bpgm	P15327	Exclusive in WT		Bisphosphoglycerate Mutase		Obese
	Ccdc124	Q9D8X2	Exclusive in WT		Coiled-Coil Domain Containing 124
	Cd163	Q2VLH6	Exclusive in WT		Macrophage-Associated Antigen
	Col3a1	P08121	Exclusive in WT		Collagen Type III Alpha 1 Chain
	Cox6a1	P43024	Exclusive in WT		Cytochrome C Oxidase Subunit 6A1		Obese
	Cpne1	Q8C166	Exclusive in WT		Copine 1
	Dnajc3	Q91YW3	Exclusive in WT		DnaJ Heat Shock Protein Family (Hsp40) Member C3
	Eea1	Q8BL66	Exclusive in WT		Early Endosome Antigen 1
	Eefsec	A0A0N4SUV6	Exclusive in WT		Eukaryotic Elongation Factor, Selenocysteine-TRNA Specific
	Exd2	Q8VEG4	Exclusive in WT		Exonuclease 3'-5' Domain Containing 2
	Ezr	P26040	Exclusive in WT		Ezrin	X
	Flad1	Q8R123	Exclusive in WT		Flavin Adenine Dinucleotide Synthetase 1
	Fdxr	Q61578	Exclusive in WT		Ferredoxin Reductase		Obese
	Gpc1	Q9QZF2	Exclusive in WT		Glypican 1
	Hfe	P70387	Exclusive in WT		Homeostatic Iron Regulator
	Itm2b	O89051	Exclusive in WT		Integral Membrane Protein 2B
	Nck1	Q99M51	Exclusive in WT		NCK Adaptor Protein 1
	Pfdn1	Q9CQF7	Exclusive in WT		Prefoldin Subunit 1
	Pi4ka	A0A140T8I9	Exclusive in WT		Phosphatidylinositol 4-Kinase Alpha
	Poldip3	F6VR84	Exclusive in WT		DNA Polymerase Delta Interacting Protein 3
	Pon1	P52430	Exclusive in WT		Paraoxonase 1
	Rdh14	Q9ERI6	Exclusive in WT		Retinol Dehydrogenase 14
	Rragb	G3UYP1	Exclusive in WT		Ras Related GTP Binding B
	Sh3glb1	Q9JK48	Exclusive in WT		SH3 Domain Containing GRB2 Like, Endophilin B1
	Stub1	Q9WUD1	Exclusive in WT		STIP1 Homology And U-Box Containing Protein 1
	Synpo2	Q91YE8	Exclusive in WT		Synaptopodin 2
	Tjp1	B9EHJ3	Exclusive in WT		Tight Junction Protein 1
	Vwa8	Q8CC88	Exclusive in WT		Von Willebrand Factor A Domain Containing 8
	Aars1	Q8BGQ7	Exclusive in Klk7KO		Alanyl-TRNA Synthetase 1
	Abracl	A0A1W2P7X0	Exclusive in Klk7KO		ABRA C-Terminal Like
	Cadm4	Q8R464	Exclusive in Klk7KO		Cell Adhesion Molecule 4
	Ccs	Q9WU84	Exclusive in Klk7KO		Copper Chaperone For Superoxide Dismutase
	Cdh1	A0A0R4IZW5	Exclusive in Klk7KO		Cadherin 1
	Dbn1	A0A0R4J1E3	Exclusive in Klk7KO		Drebrin 1
	Dsp	E9Q557	Exclusive in Klk7KO		Desmoplakin
	Gcn1	E9PVA8	Exclusive in Klk7KO		GCN1 Activator Of EIF2AK4
	Gm2a	Q60648	Exclusive in Klk7KO		GM2 Ganglioside Activator
	Gyg1	Q9R062	Exclusive in Klk7KO		Glycogenin 1
	Hdac2	Q8BQ10	Exclusive in Klk7KO		Histone Deacetylase 2
	Hs1bp3	Q3TC93	Exclusive in Klk7KO		HCLS1 Binding Protein 3
	Hspb6	Q5EBG6	Exclusive in Klk7KO		Heat Shock Protein Family B (Small) Member 6
	Il5ra	P21183	Exclusive in Klk7KO		Interleukin 5 Receptor Subunit Alpha
	Lsm2	O35900	Exclusive in Klk7KO		LSM2 Homolog, U6 Small Nuclear RNA And MRNA Degradation Associated
	Macrod1	Q922B1	Exclusive in Klk7KO		Mono-ADP Ribosylhydrolase 1
	Mydgf	Q9CPT4	Exclusive in Klk7KO		Myeloid Derived Growth Factor
	Myom1	Z4YJF5	Exclusive in Klk7KO		Myomesin 1
	Nek9	Q8K1R7	Exclusive in Klk7KO		NIMA Related Kinase 9
	Npepl1	Q6NSR8	Exclusive in Klk7KO		Aminopeptidase Like 1
	Nudt18	A0A2I3BQ34	Exclusive in Klk7KO		Nudix Hydrolase 18
	Pde3b	E9QLQ3	Exclusive in Klk7KO		Phosphodiesterase 3B
	Psmd6	A0A286YDW8	Exclusive in Klk7KO		Proteasome 26S Subunit, Non-ATPase 6
	Rarres2	Q9DD06	Exclusive in Klk7KO		Retinoic Acid Receptor Responder 2
	Rnf213	A0A171EBL2	Exclusive in Klk7KO		Ring Finger Protein 213
	Rprd1b	A0A0R4J195	Exclusive in Klk7KO		Regulation Of Nuclear Pre-MRNA Domain Containing 1B
	Smpd2	O70572	Exclusive in Klk7KO		Sphingomyelin Phosphodiesterase 2
	Synm	A0A140LJ61	Exclusive in Klk7KO		Synemin
	Tap2	P36371	Exclusive in Klk7KO		Transporter 2, ATP Binding Cassette Subfamily B Member
	Timm8b	P62077	Exclusive in Klk7KO		Translocase Of Inner Mitochondrial Membrane 8 Homolog B
	Usp14	E9PYI8	Exclusive in Klk7KO		Ubiquitin Specific Peptidase 14
	Vcan	E9QMK2	Exclusive in Klk7KO		Versican
	Ybx3	Q9JKB3	Exclusive in Klk7KO		Y-Box Binding Protein 3
	Zfp207	M0QWF0	Exclusive in Klk7KO		Zinc Finger Protein 207

## Sheet: Table S4 Klk7KO vs WT SD DEG
	Table S4. List of proteins differentially expressed in lean Klk7KO vs WT mice (adj. PVAL<0.05)
	iWAT								eWAT
	Gene name	ID	log2FC	adj. PVAL	Name	Potential substrate of KLK7	Obese or Lean marker		Gene name	ID	log2FC	adj. PVAL	Name	Potential substrate of KLK7	Obesity or lean marker
			exclusive								exclusive
	Hnrnpa1	P49312	1.5175	0.0323945	Heterogeneous nuclear ribonucleoprotein A1				none
	H1-0	P10922	1.07402	0.0303426	Histone H1.0	X			Aldh3a2	P47740	Exclusive in WT		Aldehyde dehydrogenase 3
	C4b	P01029	1.00278	0.0189742	Complement C4-B				Cnn2	Q08093	Exclusive in WT		Calponin-2
	Nono	Q99K48	0.971237	0.00474263	Non-POU domain-containing octamer-binding protein				Dlg1	D3Z3B8	Exclusive in WT		Disks large homolog 1
	Rps3a	P97351	0.615069	0.0323945	40S ribosomal protein S3a	X	Obese		Gsto1	O09131	Exclusive in WT		Glutathione S-transferase omega-1
	Slc25a5	P51881	-0.809081	0.0210587	ADP/ATP translocase 2				Il5ra	P21183	Exclusive in WT		Interleukin-5 receptor subunit alpha		Lean
	Gpi Gpi1	P06745	-0.821884	0.0232922	Glucose-6-phosphate isomerase	X			Lsm8	Q6ZWM4	Exclusive in WT		U6 snRNA-associated Sm-like protein LSm8
	Gm17087	V9GXQ2	-1.61713	0.0253186	Predicted gene 17087				Pi4ka	A0A140T8I9	Exclusive in WT		Phosphatidylinositol 4-kinase alpha
	Myh8	P13542	-2.19421	0.0047979	Myosin-8				Serpind1	P49182	Exclusive in WT		Serpin D1
	Tnnc2 Tncs	P20801	-2.44322	0.00474263	Troponin C, skeletal muscle (STNC)
	Srl Sar	Q7TQ48	-2.46208	0.0032844	Sarcalumenin
	Myl1	P05977	-2.53793	0.000999802	Myosin light chain 1/3
	Eno3	P21550	-2.55091	0.00786438	Beta-enolase
	Tnni2	P13412	-2.5903	0.00315942	Troponin I
	Atp2a1	Q8R429	-2.6453	0.00047475	Sarcoplasmic/endoplasmic reticulum calcium ATPase 1		Lean
	Casq1	O09165	-2.66495	0.0260893	Calsequestrin-1
	Mybpc2	Q5XKE0	-2.84617	0.0189742	Myosin-binding protein C
	Myh3	P13541	-3.06592	0.0162506	Myosin-3
	Actn3	O88990	-3.09901	0.00474263	Alpha-actinin-3		Lean
	Tnnt3	Q9QZ47	-3.62911	0.000642752	Troponin T
	Myh2	G3UW82	-3.70718	0.0025931	Myosin		Lean
	Neb	E9Q1W3	-4.9894	0.00047475	Nebulin		Lean
	Mylpf	P97457	-4.99916	0.00047475	Myosin regulatory light chain 2		Lean
	Aars1	Q8BGQ7	Exclusive in Klk7KO		Alanyl-TRNA Synthetase 1
	Akap12	Q9WTQ5	Exclusive in Klk7KO		A-Kinase Anchoring Protein 12		Obese
	Akt1s1	Q9D1F4	Exclusive in Klk7KO		AKT1 Substrate 1
	Arrb1	E0CY53	Exclusive in Klk7KO		Arrestin Beta 1
	C8a	A2A998	Exclusive in Klk7KO		Complement C8 Alpha Chain
	Cald1	Q8VCQ8	Exclusive in Klk7KO		Caldesmon 1		Obese
	Cbx3	Q9DCC5	Exclusive in Klk7KO		Chromobox 3
	Cct7	A0A0N4SV00	Exclusive in Klk7KO		Chaperonin Containing TCP1 Subunit 7		Obese
	Clint1	Q5SUH7	Exclusive in Klk7KO		Clathrin Interactor 1
	Ctsl	P06797	Exclusive in Klk7KO		Cathepsin L		Obese
	Ddah2	Q99LD8	Exclusive in Klk7KO		Dimethylarginine Dimethylaminohydrolase 2		Obese
	Ddi2	A2ADY9	Exclusive in Klk7KO		DNA Damage Inducible 1 Homolog 2		Obese
	Ddx6	P54823	Exclusive in Klk7KO		DEAD-Box Helicase 6		Obese
	Derl2	Q3U957	Exclusive in Klk7KO		Derlin 2		Obese
	Ear1	P97426	Exclusive in Klk7KO		Nuclear Receptor Subfamily 1 Group D Member 1
	Efhd2	Q8C845	Exclusive in Klk7KO		EF-Hand Domain Family Member D2
	Ergic1	Q9DC16	Exclusive in Klk7KO		Endoplasmic Reticulum-Golgi Intermediate Compartment 1		Obese
	Etf1	Q8BWY3	Exclusive in Klk7KO		Eukaryotic Translation Termination Factor 1
	Glg1	F8WHM5	Exclusive in Klk7KO		Golgi Glycoprotein 1		Obese
	Gns	Q8BFR4	Exclusive in Klk7KO		Glucosamine (N-Acetyl)-6-Sulfatase		Obese
	Isoc1	Q91V64	Exclusive in Klk7KO		Isochorismatase Domain Containing 1		Obese
	Itgb2	Q542I8	Exclusive in Klk7KO		Integrin Subunit Beta 2
	Lrrc59	Q922Q8	Exclusive in Klk7KO		Leucine Rich Repeat Containing 59		Obese
	Maoa	Q64133	Exclusive in Klk7KO		Monoamine Oxidase A		Obese
	Mrc1	Q61830	Exclusive in Klk7KO		Mannose Receptor C-Type 1
	Mtch1	Q791T5	Exclusive in Klk7KO		Mitochondrial Carrier 1		Obese
	Myg1	F8WGG3	Exclusive in Klk7KO		UPF0160 protein MYG1, mitochondrial
	Myof	E9Q390	Exclusive in Klk7KO		Myoferlin
	Necap2	Q9D1J1	Exclusive in Klk7KO		NECAP Endocytosis Associated 2		Obese
	Ngp	O08692	Exclusive in Klk7KO		Neutrophilic granule protein
	Odf2	A3KGV9	Exclusive in Klk7KO		Outer Dense Fiber Of Sperm Tails 2
	Osbp	Q3B7Z2	Exclusive in Klk7KO		Oxysterol Binding Protein		Obese
	Pcmt1	P23506	Exclusive in Klk7KO		Protein-L-Isoaspartate (D-Aspartate) O-Methyltransferase
	Pgm2	Q7TSV4	Exclusive in Klk7KO		Phosphoglucomutase 2
	Pgm3	Q8BWW3	Exclusive in Klk7KO		Phosphoglucomutase 3		Obese
	Pitpna	F8WGG5	Exclusive in Klk7KO		Phosphatidylinositol Transfer Protein Alpha
	Plpbp	Q9Z2Y8	Exclusive in Klk7KO		Pyridoxal Phosphate Binding Protein
	Psmb5	O55234	Exclusive in Klk7KO		Proteasome 20S Subunit Beta 5		Obese
	Rab32	Q9CZE3	Exclusive in Klk7KO		RAB32, Member RAS Oncogene Family		Obese
	Rbm25	S4R2B0	Exclusive in Klk7KO		RNA Binding Motif Protein 25
	Rtcb	Q99LF4	Exclusive in Klk7KO		RNA 2',3'-Cyclic Phosphate And 5'-OH Ligase		Obese
	Sec13	Q9D1M0	Exclusive in Klk7KO		SEC13 Homolog, Nuclear Pore And COPII Coat Complex Component		Obese
	Sec24d	Q6NXL1	Exclusive in Klk7KO		SEC24 Homolog D, COPII Coat Complex Component		Obese
	Sec61a1	P61620	Exclusive in Klk7KO		SEC61 Translocon Subunit Alpha 1		Obese
	Stab1	G3X973	Exclusive in Klk7KO		Stabilin 1
	Stmn1	D3Z1Z8	Exclusive in Klk7KO		Stathmin 1
	Thbs1	P35441	Exclusive in Klk7KO		Thrombospondin 1
	Tmed9	Q99KF1	Exclusive in Klk7KO		Transmembrane P24 Trafficking Protein 9
	Tmod3	Q9JHJ0	Exclusive in Klk7KO		Tropomodulin 3
	Uap1l1	Q3TW96	Exclusive in Klk7KO		UDP-N-Acetylglucosamine Pyrophosphorylase 1 Like 1
	Ugt1a7c	Q6ZQM8	Exclusive in Klk7KO		UDP Glucuronosyltransferase Family 1 Member A7		Obese
	Akap3	O88987	Exclusive in WT		A-Kinase Anchoring Protein 3

## Sheet: Table S5 KEGG Pathways
Top 5 KEGG pathways 2019 enrichted in iWAT of lean Klk7-/- mice:
Term	Overlap	P-value	Adjusted P-value	Genes
Protein processing in endoplasmic reticulum	5/163	0.0002669	0.0808808	SEC61A1;SEC13;UBQLN1;DERL2;SEC24D
Phagosome	5/180	0.0004212	0.0638126	SEC61A1;CTSL;ITGB2;MRC1;THBS1
Amino sugar and nucleotide sugar metabolism	3/49	0.00067404	0.0680781	UAP1L1;PGM3;PGM2
PPAR signaling pathway	3/85	0.00330312	0.250211	SLC27A1;ME1;PLIN4
Starch and sucrose metabolism	2/33	0.00594424	0.360221	PGM2;PYGM
Top 5 KEGG pathways 2019 repressed in iWAT of lean Klk7-/- mice:
Term	Overlap	P-value	Adjusted P-value	Genes
cGMP-PKG signaling pathway	5/172	8.317e-05	0.0252017	MAP2K1;ATP2A3;ATP2A1;VDAC1;SLC25A5
Calcium signaling pathway	5/189	0.0001296	0.019631	TNNC2;ATP2A3;ATP2A1;VDAC1;SLC25A5
Tight junction	4/167	0.0009291	0.0938382	MYH2;MYH3;MYH8;MYH4
HIF-1 signaling pathway	3/104	0.00250893	0.190051	MAP2K1;ENO3;GAPDH
Alzheimer disease	3/175	0.0106319	0.644294	ATP2A3;ATP2A1;GAPDH
Top 5 KEGG pathways 2019 enrichted in iWAT of obese Klk7-/- mice:
Term	Overlap	P-value	Adjusted P-value	Genes
Fatty acid elongation	5/29	1.5163e-07	4.5965e-05	HADHB;HADHA;ACAA2;TECR;HSD17B12
Fatty acid degradation	5/50	2.5181e-06	0.0003815	HADHB;HADHA;ACAA2;ACADL;ACSL1
Huntington disease	7/192	2.0583e-05	0.0020789	DNAH1;HDAC2;NDUFA4;UQCRQ;CLTA;CYCS;UQCRC2
Amyotrophic lateral sclerosis (ALS)	4/52	7.71e-05	0.00584038	CCS;CYCS;NEFM;PRPH
Pentose phosphate pathway	3/32	0.00035994	0.0218126	PGLS;ALDOA;PGM1
Top 5 KEGG pathways 2019 repressed in iWAT of obese Klk7-/- mice:
Term	Overlap	P-value	Adjusted P-value	Genes
Cholesterol metabolism	2/49	0.0086126	1	VAPA;APOH
Valine, leucine and isoleucine degradation	2/56	0.0111359	1	HIBADH;MCCC1
Glycolysis / Gluconeogenesis	2/67	0.0156721	1	PKM;BPGM
Focal adhesion	3/199	0.0191583	1	ITGA7;THBS1;PPP1CA
Riboflavin metabolism	1/8	0.0225776	1	FLAD1
Top 5 KEGG pathways 2019 repressed in eWAT of obese Klk7-/- mice:
Term	Overlap	P-value	Adjusted P-value	Genes
Protein processing in endoplasmic reticulum	5/163	1.7666e-05	0.00535294	SSR3;HSPA2;SEC23B;UBXN6;CKAP4
Sulfur relay system	1/8	0.0158911	1	TST
Endocytosis	3/269	0.0164781	1	HSPA2;CHMP6;ARF5
Sulfur metabolism	1/9	0.0178601	1	TST
Spliceosome	2/132	0.0286355	1	DDX39B;HSPA2

## Sheet: Table S6 Figure N
Figure 1	N Control chow	N Klk7-/- chow	N Control HFD	N Klk7-/- HFD		Figure 4	N Control	N Klk7-/-		Figure 6	N Control	N Klk7-/-		Gene expression		N WT	N ko
1 A	8	8	-	-		4 A	10	8		6 A	8/8	6/5		3 E iWAT (HFD)	Cidea	7	4
1 B	-	-	9	5		4 B	5	6		6 B	6	3			Dio2	7	4
1 C	8	(8/7/4)	-	-		4 C	8	6		6 C	6	3			Elovl3	5	4
1 D	-	-	9	5		4 D	8	6		6 D	6	3			Tbx1	7	4
1 E	8	8	-	-		4 F	4	5		6 E	3/3	3/3			Tmem26	7	4
1 F	-	-	9	5		4 G	3	3							Ucp1	6	4
														3 G BAT (HFD)	Dio2	6	3
Figure 2	N Control chow	N Klk7-/- chow	N Control HFD	N Klk7-/- HFD		Figure 5	N Control chow	N Klk7-/- chow	N Control HFD	N Klk7-/- HFD					Elovl3	6	3
2 A	6	7	-	-		5 A	8	8	-	-					Fgf21	6	3
2 B	6	7	-	-		5 B	8	8	-	-					Pgc1a	6	3
2 C	6	7	-	-		5 C	8	8	-	-					Prdm16	6	3
2 D	-	-	5	4		5 D	-	-	9	5					Ucp1	6	3
2 E	-	-	5	4		5 E	-	-	9	5				3 I iWAT (chow)	Cidea	10	5
2 F	-	-	5	4		5 F	-	-	9	5					Dio2	11	5
2 G	6	7	-	-											Elovl3	11	5
2 H	-	-	5	4											Tmem26	11	5
															Tbx1	11	5
															Ucp1	9	4
Figure 3	N Control	N Klk7-/-												3 J BAT (chow)	Cidea	4	3
4 A	4	4													Dio2	12	11
4 B	3	3													Elovl3	8	8
4 C	4	4													Fgf21	12	11
4 D	4	4													Pgc1a	12	11
4 F	4	4													Prdm16	12	11
4 H	3	3													Ucp1	12	10
														4 E	Dio1	8	8
															Pdk4	7	8
															Tbg	8	8
